# Supplementary material
Source: PubMed Central journal article supplement (PMC3029753)
Supplement: 1018375108_pnas.201018375SI.pdf [file 1018375108_pnas.201018375SI.pdf]

# Supporting Information

Karatsoreos et al. 10.1073/pnas.1018375108

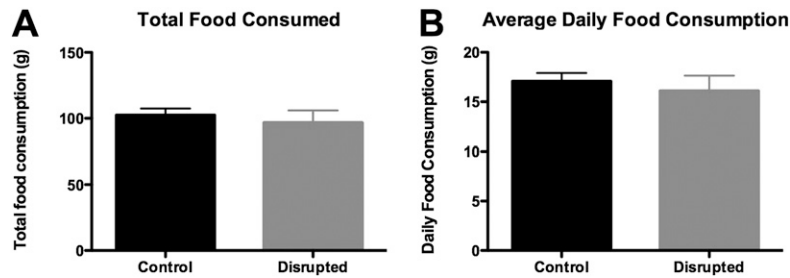

**Fig. S1.** Food consumption is not affected by housing in 10:10 LD. Graphs depict (A) the total amount of food consumed per cage ( $n = 3$  cages, five mice per cage) and (B) the average amount of food consumed per cage, per day, over 7 d during the seventh week of CD. There were no statistically significant differences between CD and control mice in either measure.

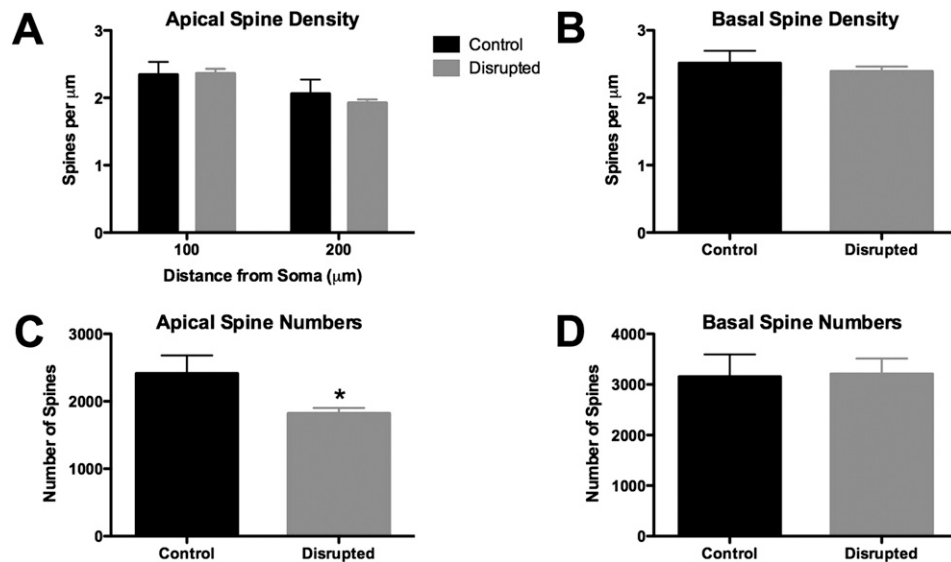

**Fig. S2.** Dendritic spine density is not altered by housing in 10:10 LD, although overall, fewer apical spines are detected in CD mice. Graphs depicting quantification of the number of dendritic spines per micrometer (A) on the apical dendrite at 100 and 200  $\mu\text{m}$  from the soma, and (B) on the basal dendrite at 100  $\mu\text{m}$  from the soma. There were no statistically significant differences detected in spine density for either the apical or basal dendrites. However, the total number of spines on the apical dendrite is reduced in CD animals (C), whereas the number of spines on the basal dendrite is unaffected in both groups (D).
